# Supplementary material
Source: PubMed Central journal article supplement (PMC3085539)

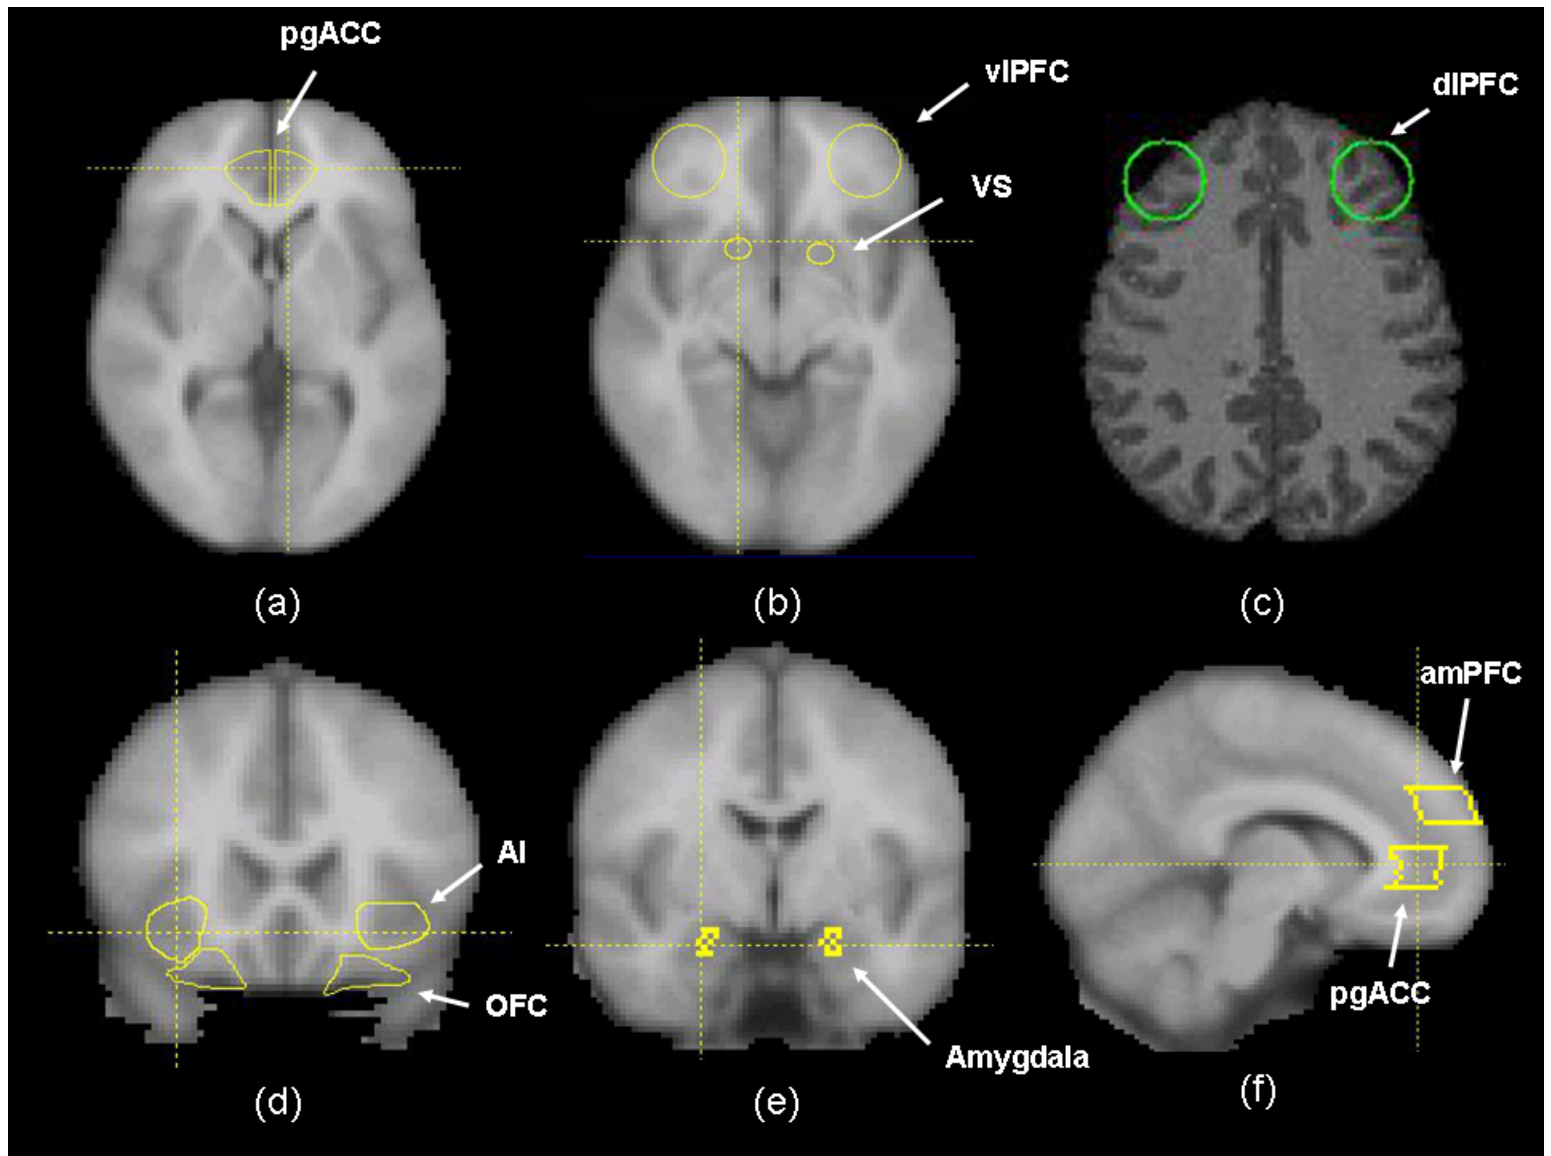

Supplement: NIHMS268319-supplement-Supplementary_Figure_1.pdf [file NIHMS268319-supplement-Supplementary_Figure_1.pdf]

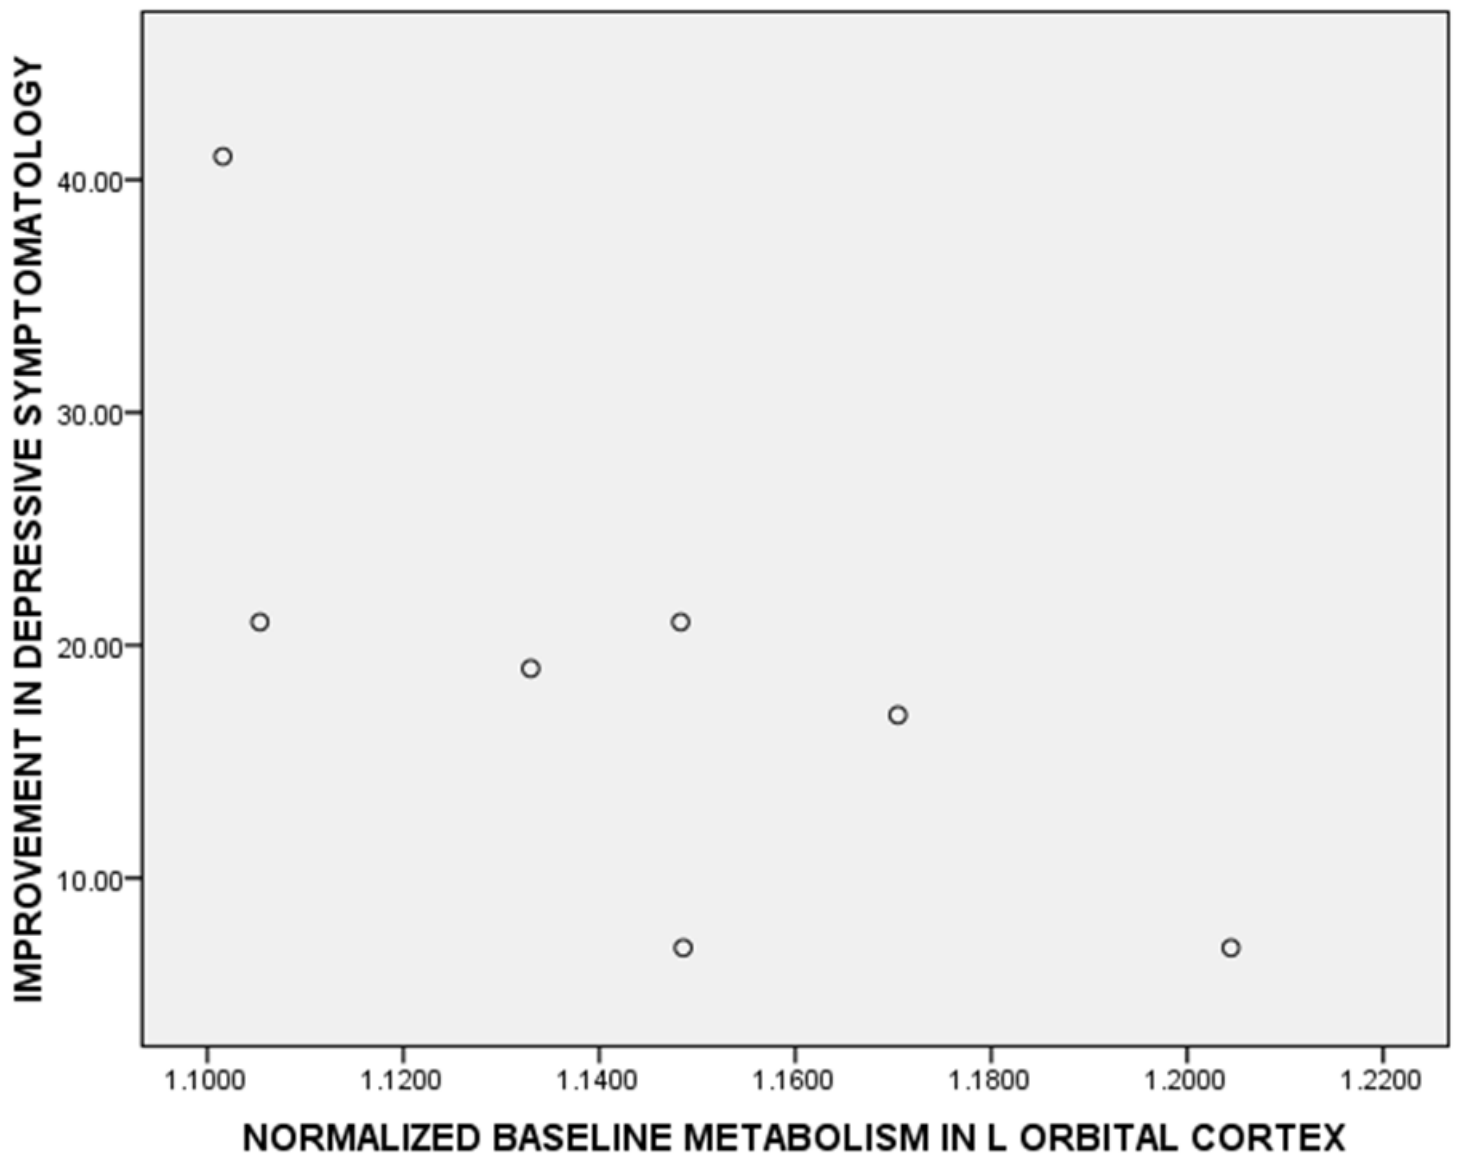

Supplement: NIHMS268319-supplement-Supplementary_Figure_2.pdf [file NIHMS268319-supplement-Supplementary_Figure_2.pdf]
